# Supplementary material for: Moderate glucose control results in less negative nitrogen balances in medical intensive care unit patients: a randomized, controlled study
Source: Springer Nature journal article supplement (doi:10.1186/cc11299), 2012-04-05
Supplement: 13054_2012_532_MOESM2_ESM.pdf [file 13054_2012_532_MOESM2_ESM.pdf]

283 patients evaluated

171 were excluded:  
21 were participating  
in another study  
64 could not provide  
informed consent  
24 were expected to stay  
in ICU < 4 days  
55 were chronic renal  
loss  
7 were postoperative

112 underwent randomization

57 were assigned to  
conventional insulin therapy

55 were assigned to  
moderate insulin therapy

57 were included in  
intention-to-treat analysis

55 were included in  
intention-to-treat analysis
