# Supplementary material for: Moderate glucose control results in less negative nitrogen balances in medical intensive care unit patients: a randomized, controlled study
Source: Springer Nature journal article supplement (doi:10.1186/cc11299), 2012-04-05

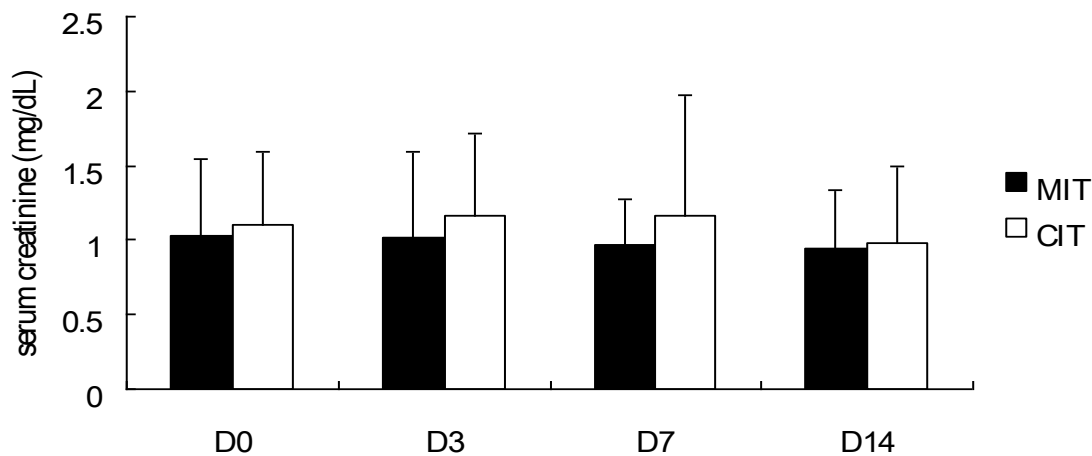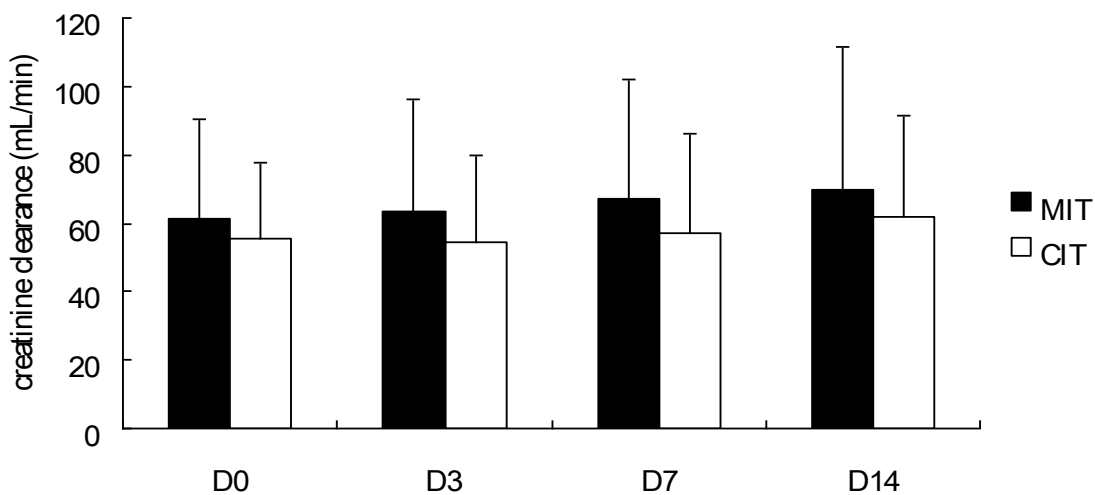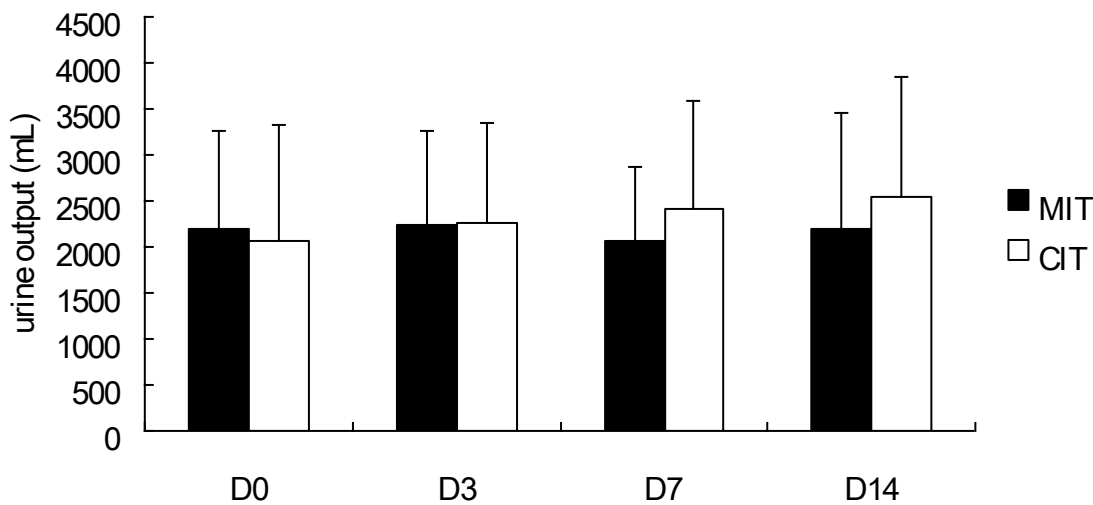

Supplement: 13054_2012_532_MOESM3_ESM.pdf [file 13054_2012_532_MOESM3_ESM.pdf]
