# Supplementary material for: Moderate glucose control results in less negative nitrogen balances in medical intensive care unit patients: a randomized, controlled study
Source: Springer Nature journal article supplement (doi:10.1186/cc11299), 2012-04-05
Supplement: 13054_2012_532_MOESM6_ESM.pdf [file 13054_2012_532_MOESM6_ESM.pdf]

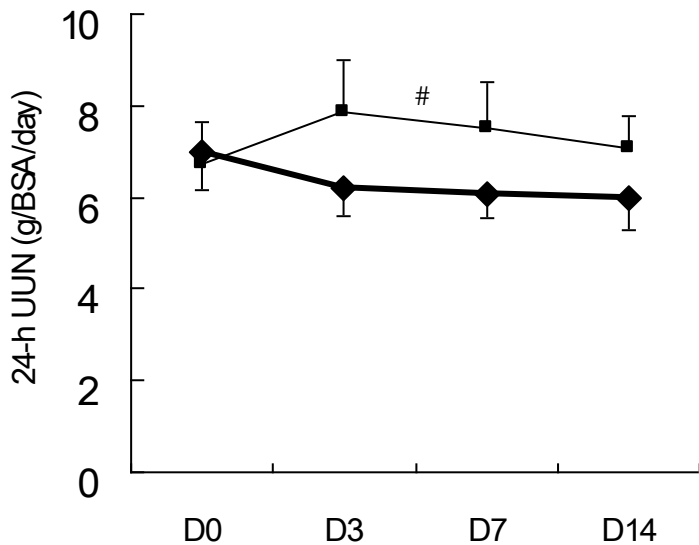

◆ MIT group  
■ CIT group

|             |    |    |    |
|-------------|----|----|----|
| N(MIT)= 55  | 55 | 38 | 20 |
| N(CIT) = 57 | 57 | 43 | 21 |

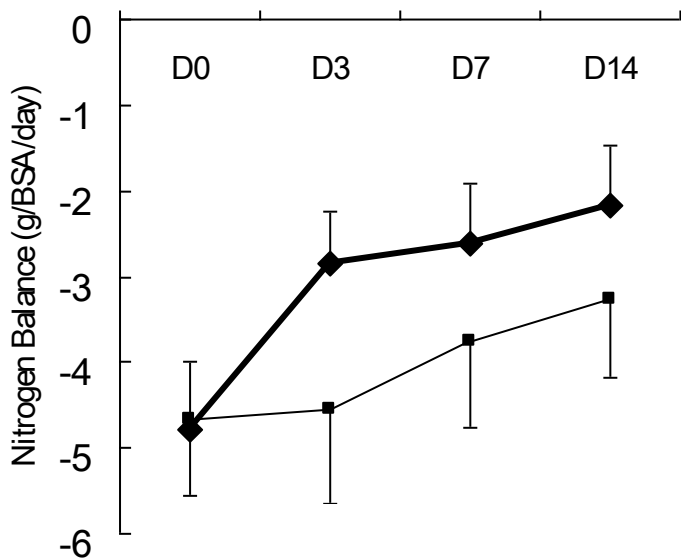

◆ MIT group  
■ CIT group

|             |    |    |    |
|-------------|----|----|----|
| N(MIT)= 55  | 55 | 38 | 20 |
| N(CIT) = 57 | 57 | 43 | 21 |
