# Supplementary material for: Moderate glucose control results in less negative nitrogen balances in medical intensive care unit patients: a randomized, controlled study
Source: Springer Nature journal article supplement (doi:10.1186/cc11299), 2012-04-05
Supplement: 13054_2012_532_MOESM7_ESM.pdf [file 13054_2012_532_MOESM7_ESM.pdf]

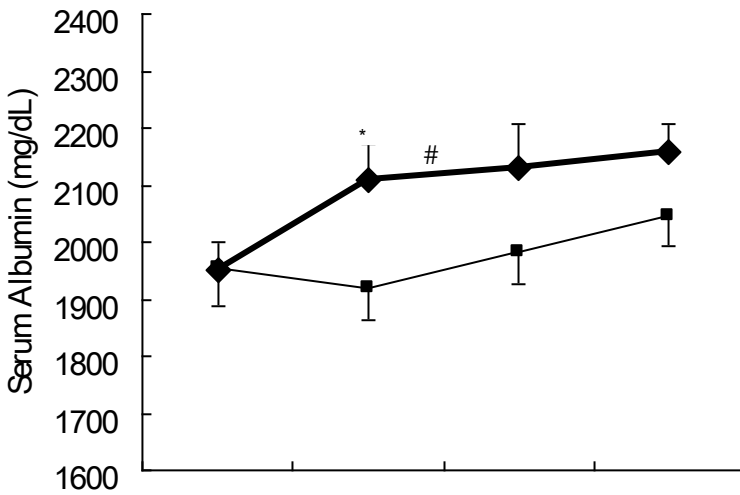

MIT group  
 CIT group

|          |    |    |    |     |
|----------|----|----|----|-----|
|          | D0 | D3 | D7 | D14 |
| N(MIT)=  | 55 | 55 | 38 | 20  |
| N(CIT) = | 57 | 57 | 43 | 21  |

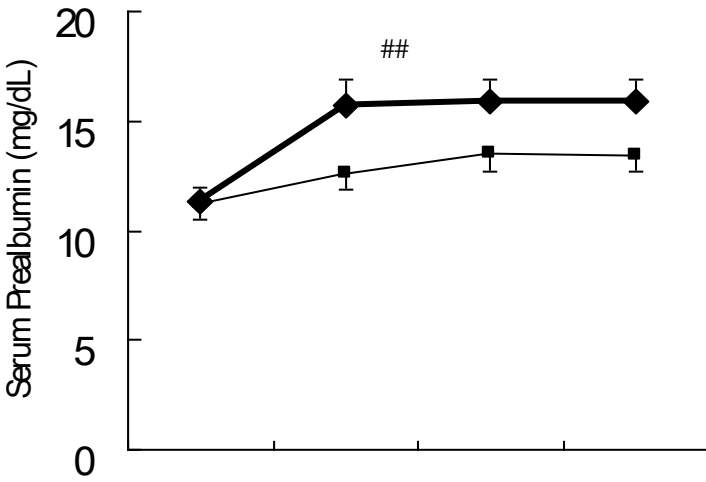

MIT group  
 CIT group

|          |    |    |    |     |
|----------|----|----|----|-----|
|          | D0 | D3 | D7 | D14 |
| N(MIT)=  | 55 | 55 | 38 | 20  |
| N(CIT) = | 57 | 57 | 43 | 21  |
